# Supplementary material for: Variants of Escherichia coli Subtilase Cytotoxin Subunits Show Differences in Complex Formation In Vitro
Source: Toxins (Basel). 2019 Dec 3;11(12):703. doi: 10.3390/toxins11120703 (PMC6950094; doi:10.3390/toxins11120703)
Supplement: Supplementary file 1 [file toxins-11-00703-s001.pdf]

# Supplementary Materials: Variants of *Escherichia coli* Subtilase Cytotoxin Subunits Show Differences in Complex Formation In Vitro

Maike Krause, Katharina Sessler, Anna Kaziales, Richard Grahl, Sabrina Noettger, Holger Barth, and Herbert Schmidt

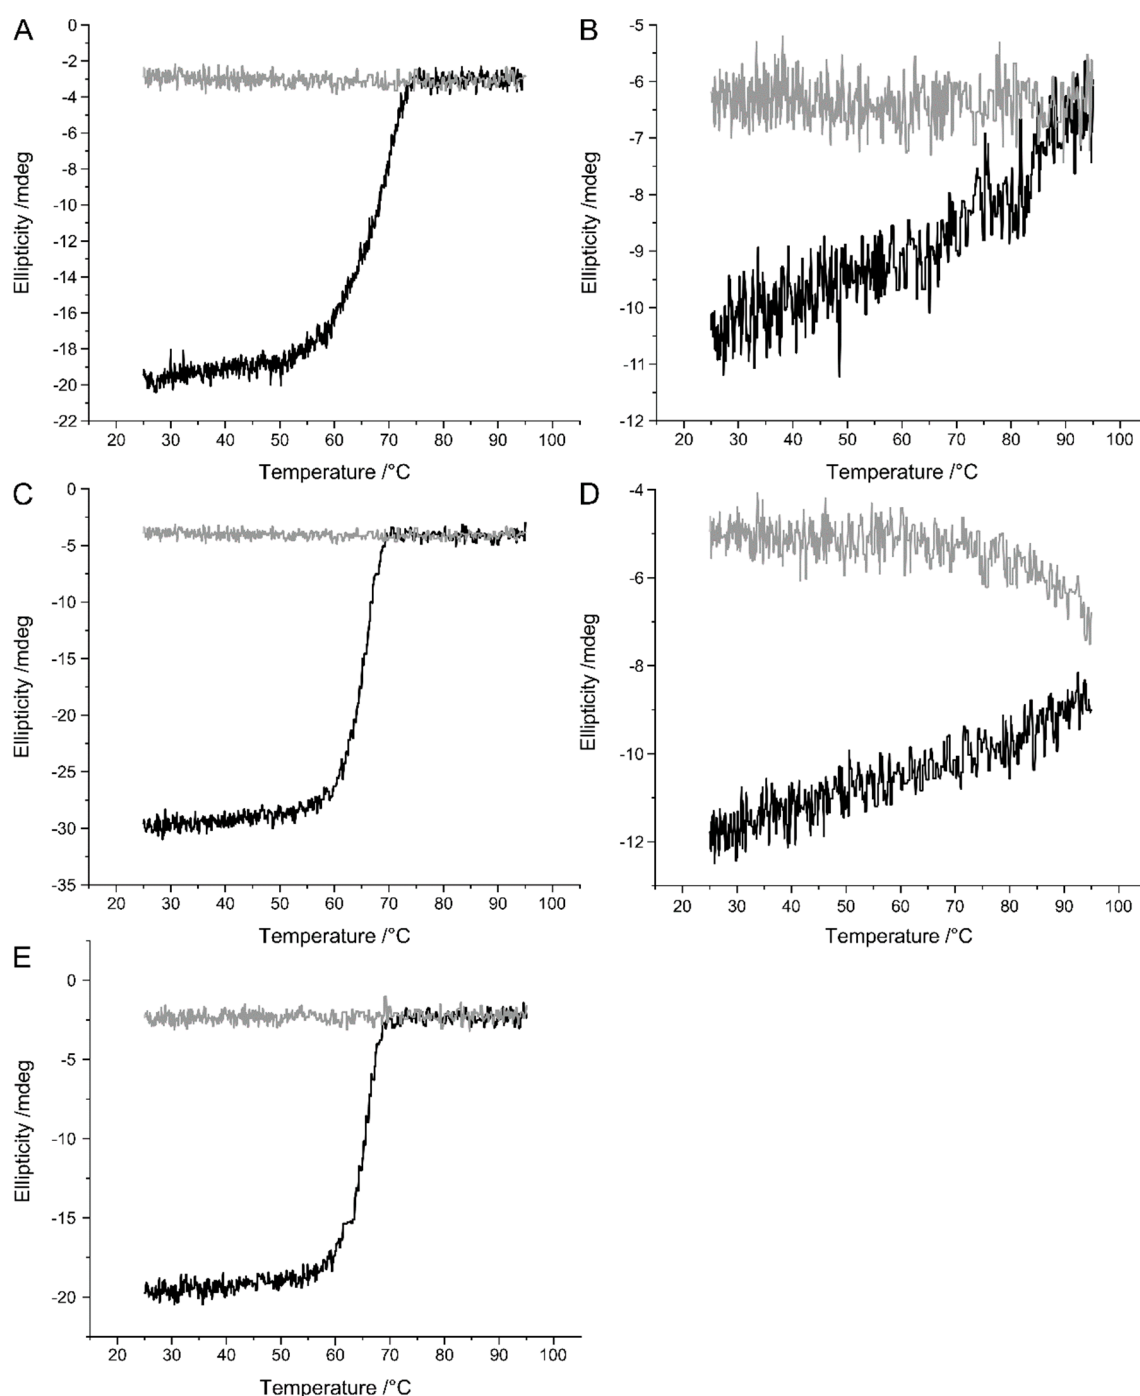

**Figure S1.** Temperature transitions of SubAB subunits. Depicted are the denaturing curve in black and the renaturing curve in gray. The transitions were measured at 220 nm for SubA1-His (A), SubA2-2-His (C), and SubA2-2 (E). SubB1-His (B) and SubB2-2-His (D) transitions were detected at 222 nm. All transitions were recorded from 25 °C to 95 °C and reverse after 180 s holding time.
